# Supplementary material
Source: HighWire-hosted journal article supplement (http://cmajopen.ca/highwire/filestream/84932/field_highwire_adjunct_files/0/2020-0174-1-at.pdf)
Supplement: 2020-0174-1-at.pdf [file 2020-0174-1-at.pdf]

Appendix 1, as supplied by the authors. Appendix to: Agarwal P, Mukerji G, Laur C, et al. Adoption, feasibility and safety of a family medicine-led remote monitoring program for patients with COVID-19: a descriptive study. *CMAJ Open* 2021. doi:10.9778/cmajo.20200174.

Copyright © 2021 The Author(s) or their employer(s).

To receive this resource in an accessible format, please contact us at [cmajgroup@cmaj.ca](mailto:cmajgroup@cmaj.ca).

## You are not alone!

Our COVIDCare@Home team will help you recover at home.

We do this virtually:

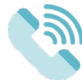

**Phone**  
(no internet required)

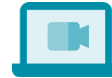

**Online**  
(using internet)

## How does COVIDCare@Home work?

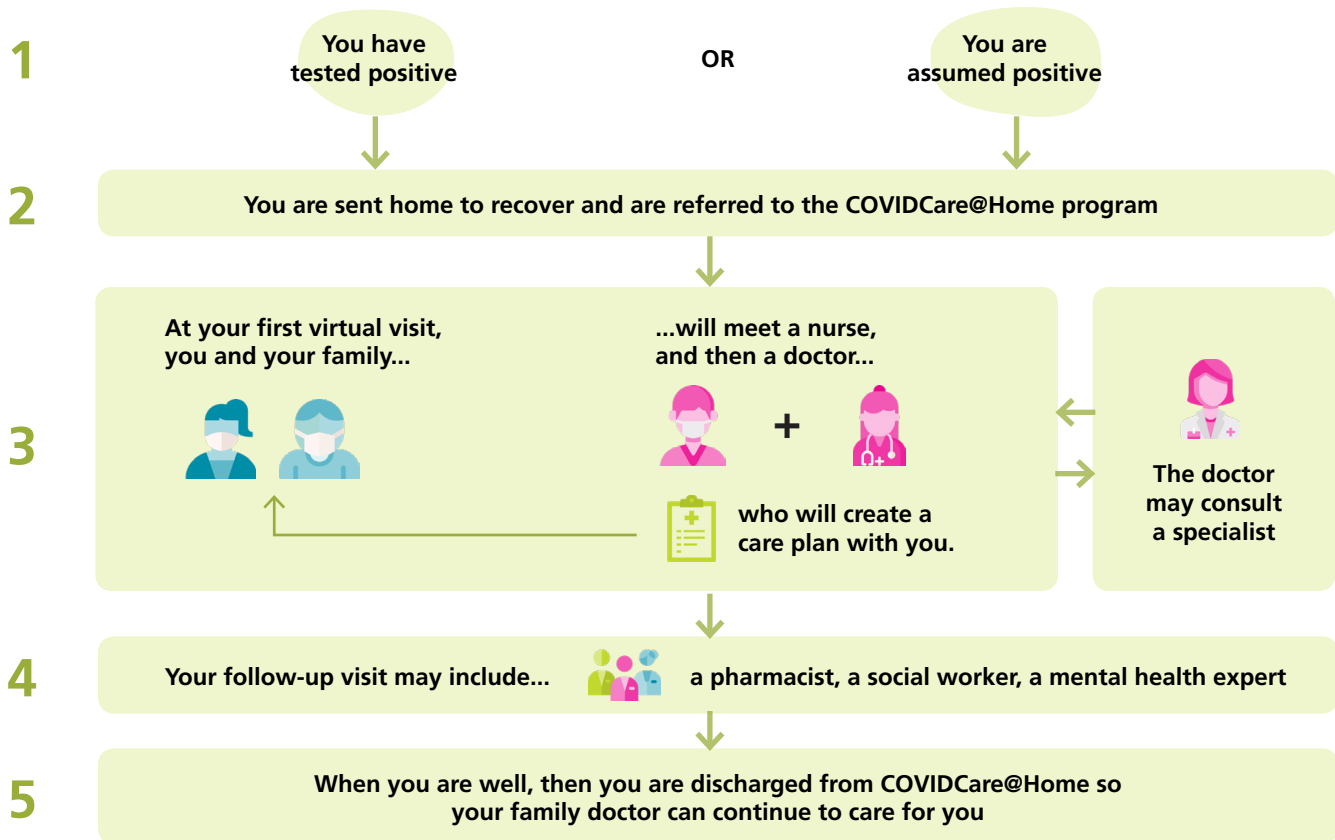

## Preparing for an appointment

For a full guide on preparing for a virtual visit, go to <https://covidcareathome.ca/appointment.html>

### Before your visit

Take some time to write down:

- your key symptoms and when they began
- questions you'd like to ask

### The day of your visit

Leave some time (15-20 min) before your visit to get ready

- Take your measurements at rest before the call begins eg. temperature, O<sub>2</sub> saturation, blood pressure, heart rate
- Log in a bit early in case there are technical difficulties

## Contact

Telephone: 416-323-6199

[covidcareathome.ca](https://covidcareathome.ca)
